# Supplementary material
Source: publisher figshare collection journal article supplement (https://asha.figshare.com/articles/dataset/_/14925330)
Supplement: Supplementary file 1 [file 1]

**Supplemental Material S2.** Linguistic parameters used for balancing the trained and untrained scripts of the VISTA+C participant.

|                                             | <b>Script 1</b> | <b>Script 2</b> | <b>Script 3</b> | <b>Script 4</b> | <b>Script 5</b> | <b>Script 6</b> |
|---------------------------------------------|-----------------|-----------------|-----------------|-----------------|-----------------|-----------------|
|                                             | Trained         | Trained         | Trained         | Trained         | Untrained       | Untrained       |
| <i>Readability Metrics:</i>                 |                 |                 |                 |                 |                 |                 |
| Flesch Kincaid Reading Ease                 | 66.1            | 73.4            | 76.5            | 67.6            | 75.9            | 85.2            |
| Flesch Kincaid Grade Level                  | 7.0             | 5.8             | 5.3             | 6.7             | 5.5             | 4.3             |
| Gunning Fog Score                           | 7.6             | 8.7             | 7.4             | 8.1             | 6.3             | 6.4             |
| Simple Measure of Gobbledygook (SMOG) Index | 6.4             | 6.8             | 5.5             | 6.4             | 6.0             | 5.0             |
| Coleman Liau Index                          | 11.2            | 9.2             | 9.8             | 12.2            | 9.6             | 7.6             |
| Automated Readability Index                 | 6.1             | 4.3             | 4.6             | 6.7             | 4.5             | 3.2             |
| Number of sentences                         | 6               | 6               | 6               | 6               | 6               | 6               |
| Number of words                             | 71              | 68              | 66              | 69              | 68              | 71              |
| Number of complex words                     | 7               | 8               | 5               | 7               | 6               | 4               |
| Percent of complex words                    | 9.9             | 11.8            | 7.6             | 10.1            | 8.8             | 5.6             |
| Average words per sentence                  | 11.8            | 11.3            | 11.0            | 11.5            | 11.3            | 11.8            |
| Average syllables per word                  | 1.5             | 1.4             | 1.4             | 1.5             | 1.4             | 1.3             |
| MLU (morphemes)                             | 13.8            | 14.0            | 13.2            | 13.5            | 13.8            | 13.5            |
| MLU (words)                                 | 11.8            | 11.3            | 11.0            | 11.5            | 11.3            | 11.8            |
| <i>Syntactic Structures:</i>                |                 |                 |                 |                 |                 |                 |
| # of verb phrases                           | 8               | 11              | 6               | 12              | 12              | 13              |
| # of clauses                                | 6               | 7               | 6               | 9               | 8               | 10              |
| # of T-units                                | 6               | 7               | 6               | 7               | 6               | 7               |
| # of dependent clauses                      | 0               | 1               | 0               | 2               | 2               | 3               |
| # of complex T-units                        | 0               | 1               | 0               | 2               | 2               | 3               |
| # of coordinates phrases                    | 6               | 0               | 5               | 0               | 3               | 0               |
| # of complex nominals                       | 3               | 8               | 4               | 6               | 7               | 7               |
| <i>Syntactic Complexity Indices:</i>        |                 |                 |                 |                 |                 |                 |
| # of clauses per sentence                   | 1.0             | 1.2             | 1.0             | 1.5             | 1.3             | 1.7             |
| # of verb phrases per T-unit                | 1.3             | 1.6             | 1.0             | 1.7             | 2.0             | 2.0             |
| # of dependent clauses per T-unit           | 0.0             | 0.1             | 0.0             | 0.3             | 0.3             | 0.4             |
| Complex T-unit ratio                        | 0.0             | 0.1             | 0.0             | 0.3             | 0.3             | 0.5             |
