# Supplementary material
Source: publisher figshare collection journal article supplement (https://asha.figshare.com/articles/dataset/_/14925330)
Supplement: Supplementary file 2 [file 1]

### **Supplemental Material S3.** Participant's script characteristics.

All scripts were balanced based on the following parameters: total number of sentences, number of words in sentences, average words per sentence, average syllables per word, number of complex words (i.e., defined as number of words with three or more syllables that are not proper nouns, a combination of simple or hyphenated words, or two-syllable verbs made into three-syllables with the addition of *-es* or *-ed* endings), mean length of utterance in morphemes, ease of readability using a Flesch Kincaid Reading Ease score (Flesch, 1948), number of verb phrases, number of clauses, number of T-units, number of dependent clauses, number of complex T-units, number of coordinate phrases, number of complex nominals, number of clauses per sentence, number of verb phrases per T-unit, number of dependent clauses per T-unit, and complex T-unit ratio (Ai & Lu, 2013; Lu, 2010, 2011; Lu & Ai, 2015).

### **References**

- Ai, H., & Lu, X. (2013). A corpus-based comparison of syntactic complexity in NNS and NS university students' writing. In A. Díaz-Negrillo, N. Ballier, & P. Thompson (Eds.), *Automatic treatment and analysis of learner corpus data* (pp. 249–264). John Benjamins.  
<https://doi.org/10.1075/scl.59.15ai>
- Flesch, R. (1948). A new readability yardstick. *Journal of Applied Psychology*, 32(3), 221–233.  
<https://doi.org/10.1037/h0057532>
- Lu, X. (2010). Automatic analysis of syntactic complexity in second language writing. *International Journal of Corpus Linguistics*, 15(4), 474–496. <https://doi.org/10.1075/ijcl.15.4.02lu>
- Lu, X. (2011). A corpus-based evaluation of syntactic complexity measures as indices of college-level ESL writers' language development. *TESOL Quarterly*, 45(1), 36–62.  
<https://doi.org/10.5054/tq.2011.240859>
- Lu, X., & Ai, H. (2015). Syntactic complexity in college-level English writing: Differences among writers with diverse L1 backgrounds. *Journal of Second Language Writing*, 29, 16–27.  
<https://doi.org/10.1016/j.jslw.2015.06.003>
