# Supplementary material
Source: publisher figshare collection journal article supplement (https://asha.figshare.com/articles/dataset/_/14925330)
Supplement: Supplementary file 3 [file 1]

**Supplemental Material S1.** The VISTA+C participant's performance on WAB-R subtests at each study time point.

| Subtest                                          | Time Point |       |         |         |          |
|--------------------------------------------------|------------|-------|---------|---------|----------|
|                                                  | Pre-       | Post- | 3-Month | 6-Month | 12-Month |
| <b><i>Spontaneous Speech</i></b>                 |            |       |         |         |          |
| Information Content                              | 10         | 10    | 10      | 10      | 9        |
| Fluency, Grammatical Competence, and Paraphasias | 9          | 9     | 9       | 9       | 9        |
| <b><i>Auditory Verbal Comprehension</i></b>      |            |       |         |         |          |
| Yes/No Questions                                 | 60         | 60    | 60      | 60      | 60       |
| Auditory Word Recognition                        | 60         | 60    | 60      | 60      | 60       |
| Sequential Commands                              | 80         | 80    | 80      | 80      | 75       |
| <b><i>Repetition</i></b>                         |            |       |         |         |          |
| Repetition                                       | 98         | 93    | 97      | 96      | 93       |
| <b><i>Naming and Word Finding</i></b>            |            |       |         |         |          |
| Object Naming                                    | 60         | 60    | 60      | 60      | 60       |
| Word Fluency                                     | 15         | 16    | 17      | 18      | 12       |
| Sentence Completion                              | 10         | 10    | 10      | 10      | 10       |
| Responsive Speech                                | 10         | 10    | 10      | 10      | 10       |
