# Supplementary material
Source: publisher figshare collection journal article supplement (https://asha.figshare.com/articles/dataset/_/14925330)
Supplement: Supplementary file 4 [file 1]

## **Supplemental Material S4.**

Initial speech rate was based on the participant's maximum attainable speaking rate during picture description and oral reading tasks and rate was incrementally increased during training contingent upon performance. To provide an ongoing challenge to VISTA participants as they progress through unison speech production home practice, we now incrementally alter the audiovisual stimuli's rate, based on a participant's performance (Schaffer et al., 2018). That is, if the participant achieves criterion of producing correct, intelligible scripted consent with 90% accuracy and successfully engages in unison speech production with the video during the treatment session, then the rate of the video is increased by 10% between sessions. Adobe Audition© and Adobe After Effects© software are used to manipulate video and audio content. Given that each script is targeted in treatment three times, there are three potential video rate manipulation gradations (i.e., original rate, first rate increase, second rate increase). This participant consistently advanced through all three levels for all trained scripts.

## **Reference**

Schaffer, K. M., Grasso, S. M., Hubbard, H. I., Berstis, K., Gorno-Tempini, M. L., & Henry, M. L. (2018). *Speech-language treatment in nonfluent/agrammatic primary progressive aphasia: A modified video implemented script training approach* [Paper presentation]. American Speech-Language Hearing Association Convention.
